# Supplementary material for: Synthesis of high-quality CdS, ZnS, and ZnxCd1 − xS nanocrystals using metal salts and elemental sulfur
Source: Royal Society of Chemistry journal article supplement (doi:10.1039/b407556k), 2004-01-01
Supplement: b407556k.doc [file b407556k.doc]

# Supporting Information

**Synthesis of High-quality CdS, ZnS, and ZnxCd1-xS Nanocrystals Using Metal Salts and Elemental Sulfur**

Xinhua Zhong, Shuhua Liu,Zhihua Zhang, Lin Li, Zheng Wei and Wolfgang Knoll

**Fig. 1s**. Power-XRD patterns of hexagonal (wurtzite) CdS nanocrystals using CdSO4 or CdCl2 as the Cd source. The line XRD spectrum corresponds to bulk hexagonal CdS (bottom).
